# Supplementary material for: Grandmaternal smoking, asthma and lung function in the offspring: the Lifelines cohort study
Source: PubMed Central journal article supplement (PMC8070652; doi:10.1136/thoraxjnl-2020-215232), 2021-02-04
Supplement: thoraxjnl-2020-215232supp001.pdf [file thoraxjnl-2020-215232supp001.pdf]

## Supplementary Tables

|                        | Information on grandparental smoking | Without information on grandparental smoking | P-value |
|------------------------|--------------------------------------|----------------------------------------------|---------|
| N                      | 37291                                | 85291                                        |         |
| Age, years             | 24.7 (11.9)                          | 40.2 (8.0)                                   | <0.001  |
| Male gender            | 15467 (41.5)                         | 35239 (41.3)                                 | 0.600   |
| Child, < 18 years      | 11544 (31.0)                         | 931 (1.1)                                    | <0.001  |
| Maternal smoking       | 5981 (17.9)                          | 14363 (21.6)                                 | <0.001  |
| Asthma                 | 4019 (11.1)                          | 8027 (9.6)                                   | <0.001  |
| Early onset asthma     | 2021 (5.9)                           | 2188 (2.8)                                   | <0.001  |
| Spirometry performed   | 24959 (66.9)                         | 61605 (72.2)                                 | <0.001  |
| FEV1 % predicted       | 95.2 (10.9)                          | 95.3 (12.2)                                  | 0.037   |
| FVC % predicted        | 98.0 (10.5)                          | 99.6 (11.4)                                  | <0.001  |
| FEV1/FVC               | 0.82 (0.07)                          | 0.78 (0.07)                                  | <0.001  |
| FEV1/FVC % predicted   | 96.6 (7.3)                           | 95.4 (7.8)                                   | <0.001  |
| Active smoking         |                                      |                                              |         |
| Never                  | 25231 (70.5)                         | 39706 (49.1)                                 |         |
| Ex                     | 4561 (12.7)                          | 22194 (27.5)                                 | <0.001  |
| Current                | 6007 (16.8)                          | 18940 (23.4)                                 |         |
| ETS in childhood       |                                      |                                              |         |
| No                     | 17431 (49.1)                         | 17872 (22.1)                                 |         |
| Yes                    | 16830 (47.5)                         | 62252 (77.2)                                 | <0.001  |
| Unknown                | 1204 (3.4)                           | 563 (0.7)                                    |         |
| Maternal age, years    | 27.8 (4.3)                           | 27.2 (4.7)                                   | <0.001  |
| Birthweight, gram      | 3455.4 (593.2)                       | 3434.4 (642.5)                               | <0.001  |
| Gestational age, years | 39.7 (1.9)                           | 39.7 (1.8)                                   | 0.586   |
| Breastfeeding          |                                      |                                              |         |
| No                     | 8124 (23.0)                          | 20886 (26.0)                                 |         |
| Yes                    | 26162 (74.2)                         | 50588 (62.9)                                 | <0.001  |
| Unknown                | 987 (2.8)                            | 8889 (11.1)                                  |         |
| Income                 |                                      |                                              |         |
| <1000                  | 4922 (13.2)                          | 4394 (5.3)                                   |         |
| 1000-2000              | 6614 (17.7)                          | 16386 (19.6)                                 |         |
| 2000-3000              | 9967 (26.7)                          | 24737 (29.6)                                 | <0.001  |
| >3000                  | 11994 (32.2)                         | 25961 (31.0)                                 |         |
| other                  | 3785 (10.2)                          | 12157 (14.5)                                 |         |
| Education              |                                      |                                              |         |
| Low                    | 2019 (5.4)                           | 11582 (13.7)                                 |         |
| Intermediate           | 19938 (53.5)                         | 46361 (54.6)                                 | <0.001  |
| High                   | 14936 (40.1)                         | 25590 (30.2)                                 |         |
| Other/Unknown          | 390 (1.0)                            | 1300 (1.5)                                   |         |

Table S1: Subjects with information on grandmaternal smoking during pregnancy (maternal and/or paternal) compared to subjects with no information on grandmaternal smoking.

|                    | Children (< 18 years)   |      |                         |      | Adults (≥ 18 years)       |      |                          |      |
|--------------------|-------------------------|------|-------------------------|------|---------------------------|------|--------------------------|------|
|                    | Asthma                  |      | Early childhood asthma  |      | Asthma                    |      | Early childhood asthma   |      |
|                    | OR (95% CI)             | P    | OR (95% CI)             | P    | OR (95% CI)               | P    | OR (95% CI)              | P    |
| Total              | 742 cases/6042 controls |      | 588 cases/6042 controls |      | 1495 cases/12644 controls |      | 587 cases/12644 controls |      |
| Unadjusted         | 1.08 (0.89;1.31)        | .452 | 1.20 (0.97;1.48)        | .087 | 1.21 (0.96;1.53)          | .109 | 1.33 (0.94;1.88)         | .107 |
| Adjusted           | 1.05 (0.86;1.28)        | .638 | 1.17 (0.95;1.44)        | .152 | 1.14 (0.90;1.45)          | .266 | 1.15 (0.81;1.64)         | .436 |
| Females            | 312 cases/3060 controls |      | 219 cases/3060 controls |      | 889 cases/7505 controls   |      | 278 cases/7505 controls  |      |
| Unadjusted         | 0.93 (0.69;1.26)        | .645 | 1.16 (0.83;1.62)        | .398 | 1.33 (0.99;1.78)          | .058 | 1.56 (0.98;2.49)         | .062 |
| Adjusted           | 0.95 (0.70;1.29)        | .736 | 1.14 (0.81;1.60)        | .460 | 1.28 (0.95;1.72)          | .108 | 1.36 (0.84;2.18)         | .208 |
| Males              | 430 cases/2982 controls |      | 369 cases/2982 controls |      | 606 cases/5139 controls   |      | 309 cases/5139 controls  |      |
| Unadjusted         | 1.19 (0.93;1.53)        | .167 | 1.23 (0.94;1.60)        | .126 | 1.04 (0.70;1.54)          | .847 | 1.13 (0.67;1.90)         | .646 |
| Adjusted           | 1.13 (0.88;1.46)        | .349 | 1.19 (0.91;1.56)        | .203 | 0.97 (0.65;1.44)          | .863 | 0.97 (0.57;1.65)         | .914 |
| Non-smoking mother | 639 cases/5410 controls |      | 516 cases/5410 controls |      | 1051 cases/9104 controls  |      | 406 cases/9104 controls  |      |
| Unadjusted         | 1.02 (0.83;1.27)        | .831 | 1.14 (0.91;1.43)        | .262 | 1.29 (0.96;1.71)          | .088 | 1.44 (0.94;2.19)         | .096 |
| Adjusted           | 0.99 (0.80;1.23)        | .938 | 1.10 (0.87;1.39)        | .417 | 1.25 (0.94;1.67)          | .130 | 1.28 (0.83;1.97)         | .264 |
| Smoking mother     | 69 cases/572 controls   |      | 57 cases/572 controls   |      | 290 cases/2202 controls   |      | 118 cases/2202 controls  |      |
| Unadjusted         | 1.39 (0.80;2.40)        | .239 | 1.59 (0.89;2.85)        | .120 | 1.21 (0.76;1.93)          | .426 | 1.36 (0.70;2.67)         | .364 |
| Adjusted           | 1.35 (0.76;2.41)        | .305 | 1.57 (0.85;2.92)        | .153 | 1.10 (0.68;1.77)          | .693 | 1.20 (0.60;2.39)         | .603 |

Table S2: Paternal grandmaternal smoking during pregnancy and risk for asthma and early childhood asthma in grandchildren. Stratified by gender and maternal smoking. Adjusted for gender, maternal smoking, current or former smoking, passive environmental smoke exposure in childhood, maternal age, birthweight, gestational age, breastfeeding and socioeconomic status.

|                | Children (< 18 years) |        |                   |        | Adults (≥ 18 years) |      |                    |      |
|----------------|-----------------------|--------|-------------------|--------|---------------------|------|--------------------|------|
|                | FEV <sub>1</sub>      |        | FVC               |        | FEV <sub>1</sub>    |      | FVC                |      |
|                | B (95% CI)            | P      | B (95% CI)        | P      | B (95% CI)          | P    | B (95% CI)         | P    |
| Total          | n=6216                |        | n=6216            |        | n=14752             |      | n=14752            |      |
| Unadjusted     | 0.78 (0.17;1.39)      | .013   | 1.07 (0.48;1.66)  | <0.001 | -0.49 (-1.24;0.26)  | .200 | -0.3 (-1.01;0.42)  | .415 |
| Adjusted       | 0.93 (0.31;1.55)      | .003   | 1.05 (0.45;1.65)  | .001   | -0.05 (-0.80;0.71)  | .901 | 0.09 (-0.63;0.81)  | .809 |
| Females        | n=3376                |        | n=3376            |        | n=9163              |      | n=9163             |      |
| Unadjusted     | 0.28 (-0.53;1.09)     | .498   | 0.69(-0.11;1.5)   | .092   | -0.44 (-1.36;0.48)  | .353 | -0.74 (-1.63;0.15) | .103 |
| Adjusted       | 0.26 (-0.56;1.08)     | .541   | 0.45 (-0.36;1.26) | .277   | 0.15 (-0.78;1.08)   | .751 | -0.22 (-1.12;0.68) | .628 |
| Males          | n=2840                |        | n=2840            |        | n=5589              |      | n=5589             |      |
| Unadjusted     | 1.40 (0.46;2.33)      | .004   | 1.53 (0.66;2.41)  | .001   | -0.60 (-1.89;0.70)  | .366 | 0.47 (-0.73;1.66)  | .443 |
| Adjusted       | 1.81 (0.86;2.75)      | <0.001 | 1.85 (0.96;2.73)  | <0.001 | -0.31 (-1.62;0.99)  | .637 | 0.7 (-0.51;1.9)    | .260 |
| Non-smoking    | n=5030                |        | n=5030            |        | n=10505             |      | n=10505            |      |
| Unadjusted     | 0.97 (0.27;1.68)      | .007   | 1.22 (0.54;1.9)   | <0.001 | 0.07 (-0.92;1.07)   | .887 | -0.38 (-1.32;0.57) | .434 |
| Adjusted       | 0.97 (0.26;1.68)      | .008   | 1.17 (0.49;1.85)  | .001   | 0.37 (-0.63;1.37)   | .466 | 0.06 (-0.88;1.01)  | .895 |
| Smoking mother | n=710                 |        | n=710             |        | n=2736              |      | n=2736             |      |
| Unadjusted     | 1.28 (-0.34;2.89)     | .121   | 1.23 (-0.33;2.79) | .123   | -1.20 (-2.52;0.11)  | .073 | -0.52 (-1.79;0.75) | .420 |
| Adjusted       | 1.38 (-0.28;3.03)     | .103   | 1.37 (-0.23;2.96) | .092   | -0.74 (-2.07;0.59)  | .276 | 0.10 (-1.18;1.39)  | .873 |

Table S3: Maternal grandmaternal smoking during pregnancy and FEV<sub>1</sub> % predicted and FVC % predicted in grandchildren. Stratified by gender and maternal smoking. Adjusted for gender, maternal smoking, current or former smoking, passive environmental smoke exposure in childhood, maternal age, birthweight, gestational age, breastfeeding and socioeconomic status. B = Beta-coefficient.
